# Supplementary material for: Airborne bacteria in show caves from Southern Spain
Source: PubMed Central journal article supplement (PMC8485469; doi:10.15698/mic2021.10.762), 2021-07-26
Supplement: mic-08-247-s01.pdf [file mic-08-247-s01.pdf]

**Supplementary Table S1.** Sampling campaign in *Cueva de Ardales*, spring 2011. CFU/m<sup>3</sup>, accession numbers, identifications and abundances.

| Sampling              | CFU/m <sup>3</sup> air                                                        | Accession Number | Identification (% identity)                                                                                                                      | Abundance (%) |
|-----------------------|-------------------------------------------------------------------------------|------------------|--------------------------------------------------------------------------------------------------------------------------------------------------|---------------|
| Sala del Calvario     | 0                                                                             |                  |                                                                                                                                                  |               |
| Sala de las Estrellas | 90±70                                                                         | MZ338588         | <i>Arthrobacter ruber</i> (JX949648; 99.5%)                                                                                                      | 5.6           |
|                       |                                                                               | MZ338589         | <i>Micrococcus luteus</i> (CP001628; 98.7%)                                                                                                      | 11.0          |
|                       |                                                                               | MZ338590         | <i>Micrococcus terreus</i> (jgi.1058018; 99.3%)                                                                                                  | 11.0          |
|                       |                                                                               | LN650666         | <i>Paracoccus cavernae</i> sp. nov. (LN650666; 100%)                                                                                             | 5.6           |
|                       |                                                                               | MZ338591         | <i>Paracoccus marcusii</i> (Y12703; 99.9%)                                                                                                       | 5.6           |
|                       |                                                                               | MZ338592         | <i>Prolinoborus fasciculus</i> (JN175353; 99.9%)                                                                                                 | 5.6           |
|                       |                                                                               | MZ338593         | <i>Pseudarthrobacter phenanthrenivorans</i> (CP002379; 99.6%)                                                                                    | 50.0          |
| End of stair          | 200±30                                                                        | MZ338594         | <i>Streptomyces narbonensis</i> (AB184157; 99.4%)                                                                                                | 5.6           |
|                       |                                                                               | MZ338595         | <i>Arthrobacter ruber</i> (JX949648; 98.8%)                                                                                                      | 2.6           |
|                       |                                                                               | MZ338596         | <i>Bacillus mycoides</i> (ACMU01000002; 99.3%)                                                                                                   | 2.6           |
|                       |                                                                               | MZ338597         | <i>Kocuria palustris</i> (Y16263; 100%)                                                                                                          | 5.3           |
|                       |                                                                               | MZ338598         | <i>Micrococcus luteus</i> (CP001628; 99.4%)                                                                                                      | 23.7          |
|                       |                                                                               | MZ338599         | <i>Paenibacillus glacialis</i> (EU815300; 98.7%)                                                                                                 | 2.6           |
|                       |                                                                               | MZ338600         | <i>Pseudarthrobacter oxydans</i> (X83408; 99.2%)                                                                                                 | 31.6          |
|                       |                                                                               | MZ338601         | <i>Pseudomonas zhaodongensis</i> (RFFM01000015; 98.7%)                                                                                           | 2.6           |
|                       |                                                                               | MZ338602         | <i>Psychrobacillus psychrodurans</i> (jgi.1085849; 99.7%)                                                                                        | 5.3           |
|                       |                                                                               | MZ338603         | <i>Rathayibacter festucae</i> (CP028137; 99.6%)                                                                                                  | 5.3           |
|                       |                                                                               | MZ338604         | <i>Staphylococcus cohnii</i> subsp. <i>cohnii</i> (D83361; 99.9%)                                                                                | 2.6           |
| MZ338605              | <i>Staphylococcus hominis</i> subsp. <i>novobiosepticus</i> (AB233326; 99.9%) | 13.2             |                                                                                                                                                  |               |
| MZ338606              | <i>Streptomyces pratensis</i> (JQ806215; 99.7%)                               | 2.6              |                                                                                                                                                  |               |
| Outdoor air           | 320±110                                                                       | MZ338607         | <i>Arthrobacter bussei</i> (MN080869; 99.9%)                                                                                                     | 5.0           |
|                       |                                                                               | MZ338608         | <i>Arthrobacter humicola</i> (AB279890; 100%)                                                                                                    | 20.0          |
|                       |                                                                               | MZ338609         | <i>Bacillus mycoides</i> (ACMU01000002; 99.3%)                                                                                                   | 1.7           |
|                       |                                                                               | MZ338610         | <i>Clavibacter michiganensis</i> subsp. <i>chilensis</i> (KF663872)/<br><i>C. michiganensis</i> subsp. <i>californiensis</i> (KF663871); (99.8%) | 13.3          |
|                       |                                                                               | MZ338611         | <i>Curtobacterium flaccumfaciens</i> (AJ31209; 99.9%)                                                                                            | 3.3           |
|                       |                                                                               | MZ338612         | <i>Frigoribacterium faeni</i> (BJUV01000064; 99.4%)                                                                                              | 1.7           |
|                       |                                                                               | MZ338613         | <i>Paenarthrobacter aurescens</i> (BJMD01000050; 99.4%)                                                                                          | 1.7           |
|                       |                                                                               | MZ338614         | <i>Paenibacillus stellifer</i> (CP009286; 97.7%)                                                                                                 | 1.7           |
| MZ338615              | <i>Peribacillus simplex</i> (BCVO01000086; 99.5%)                             | 8.3              |                                                                                                                                                  |               |

**Supplementary Table S1. Continuation**

| Sampling    | CFU/m <sup>3</sup> air | Accession Number | Identification (% identity)                                              | Abundance (%) |
|-------------|------------------------|------------------|--------------------------------------------------------------------------|---------------|
| Outdoor air | 320±110                | MZ338616         | <i>Pseudarthrobacter oxydans</i> (X83408; 98.7%)                         | 23.3          |
|             |                        | MZ338617         | <i>Pseudomonas kunmingensis</i> (JQ246444; 99.6%)                        | 1.7           |
|             |                        | MZ338618         | <i>Rathayibacter festucae</i> (CP028137; 99.0%)                          | 5.0           |
|             |                        | MZ338619         | <i>Solibacillus kalamii</i> (KT763359; 99.2%)                            | 1.7           |
|             |                        | MZ338620         | <i>Staphylococcus cohnii</i> subsp. <i>urealyticus</i> (AB009936; 99.9%) | 6.7           |
|             |                        | MZ338621         | <i>Terribacillus saccharophilus</i> (AB243845; 100%)                     | 5.0           |

**Supplementary Table S2.** Sampling campaign in *Cueva de Ardales*, summer 2011. CFU/m<sup>3</sup>, accession numbers, identifications and abundances.

| Sampling              | CFU/m <sup>3</sup> air                               | Accession Number | Identification (% identity)                                             | Abundance (%) |
|-----------------------|------------------------------------------------------|------------------|-------------------------------------------------------------------------|---------------|
| Sala del Calvario     | 20±14                                                | MZ338622         | <i>Micrococcus endophyticus</i> (EU005372; 99.5%)                       | 25.0          |
|                       |                                                      | MZ338623         | <i>Peribacillus simplex</i> (BCVO01000086; 99.5%)                       | 50.0          |
|                       |                                                      | MZ338624         | <i>Terrabacter terrigena</i> (FJ423552; 97.7%)                          | 25.0          |
| Sala de las Estrellas | 40±10                                                | MZ338625         | <i>Bacillus altitudinis</i> (ASJC01000029; 100%)                        | 62.5          |
|                       |                                                      | MZ338626         | <i>Ensifer numidicus</i> (AY500254; 99.7%)                              | 12.5          |
|                       |                                                      | MZ338627         | <i>Noviherbaspirillum canariense</i> (HQ830496; 98.7%)                  | 12.5          |
|                       |                                                      | MZ338628         | <i>Peribacillus simplex</i> (BCVO01000086; 100%)                        | 12.5          |
| End of stair          | 40±40                                                | MZ338629         | <i>Arthrobacter methylotrophus</i> (AF235090; 98.4%)                    | 42.8          |
|                       |                                                      | MZ338630         | <i>Metabacillus litoralis</i> (AY608605; 98.8%)                         | 14.3          |
|                       |                                                      | MZ338631         | <i>Prolinoborus fasciculus</i> (JN175353; 99.1%)                        | 14.3          |
|                       |                                                      | MZ338632         | <i>Variovorax boronicumulans</i> (AB300597; 99.9%)                      | 28.6          |
| Outdoor air           | 90±30                                                | MZ338633         | <i>Arthrobacter gyeryongensis</i> (JX141781; 99.1%)                     | 16.6          |
|                       |                                                      | MZ338634         | <i>Arthrobacter ruber</i> (JX949648; 99.7%)                             | 5.6           |
|                       |                                                      | MZ338635         | <i>Frigoribacterium faeni</i> (BJUV01000064; 98.6%)                     | 5.6           |
|                       |                                                      | MZ338636         | <i>Mesobacillus subterraneus</i> (RSFW01000004; 98.8%)                  | 5.6           |
|                       |                                                      | MZ338637         | <i>Micrococcus luteus</i> (CP001628; 99.8%)                             | 5.6           |
|                       |                                                      | MZ338638         | <i>Nocardia salmonicida</i> subsp. <i>cummidelens</i> (AF277202; 99.1%) | 16.6          |
|                       |                                                      | MZ338639         | <i>Peribacillus simplex</i> (BCVO01000086; 99.7%)                       | 16.6          |
|                       |                                                      | MZ338640         | <i>Pseudarthrobacter siccitolerans</i> (CAQI01000001; 99.0%)            | 22.2          |
| MZ338641              | <i>Solibacillus isronensis</i> (AMCK01000046; 99.5%) | 5.6              |                                                                         |               |

**Supplementary Table S3.** Sampling campaign in *Cueva de Ardales*, autumn 2011. CFU/m<sup>3</sup>, accession numbers, identifications and abundances.

| Sampling              | CFU/m <sup>3</sup> air                           | Accession Number | Identification (% identity)                                                           | Abundance (%) |
|-----------------------|--------------------------------------------------|------------------|---------------------------------------------------------------------------------------|---------------|
| Sala del Calvario     | 180±0                                            | MZ338642         | <i>Arthrobacter methylotrophus</i> (AF235090; 98.7%)                                  | 3.0           |
|                       |                                                  | MZ338643         | <i>Brevibacillus choshinensis</i> (LJJB01000010; 99.8%)                               | 3.0           |
|                       |                                                  | MZ338644         | <i>Macrococcus equiperficus</i> (Y15712; 99.6%)                                       | 3.0           |
|                       |                                                  | MZ338645         | <i>Micrococcus luteus</i> (CP001628; 99.8%)                                           | 84.8          |
|                       |                                                  | MZ338646         | <i>Streptomyces gardneri</i> (AB249908; 100%)                                         | 6.2           |
| Sala de las Estrellas | 70±10                                            | MZ338647         | <i>Aminobacter aminovorans</i> (AJ011759; 100%)                                       | 7.7           |
|                       |                                                  | MZ338648         | <i>Brachybacterium paraconglomeratum</i> (AJ415377; 99.6%)                            | 7.7           |
|                       |                                                  | MZ338649         | <i>Micrococcus luteus</i> (CP001628; 99.8%)                                           | 53.8          |
|                       |                                                  | MZ338650         | <i>Phyllobacterium ifriqiyense</i> (AY785325; 99.8%)                                  | 30.8          |
| End of stair          | 140±40                                           | MZ338651         | <i>Bacillus proteolyticus</i> (MACH01000033; 99.9%)                                   | 11.1          |
|                       |                                                  | MZ338652         | <i>Enterococcus faecium</i> (AJ301830; 99.2%)                                         | 7.4           |
|                       |                                                  | MZ338653         | <i>Micrococcus luteus</i> (CP001628; 99.8%)                                           | 59.3          |
|                       |                                                  | MZ338654         | <i>Pseudarthrobacter psychrotolerans</i> (MN559964; 99.9%)                            | 11.1          |
|                       |                                                  | MZ338655         | <i>Pseudomonas zhaodongensis</i> (RFFM01000015; 98.8%)                                | 11.1          |
| Outdoor air           | 180±100                                          | MZ338656         | <i>Agromyces cerinus</i> subsp. <i>cerinus</i> (jgi.1107671; 99.0%)                   | 2.9           |
|                       |                                                  | MZ338657         | <i>Bhargavaea cecembensis</i> (AM286423; 99.7%)                                       | 5.9           |
|                       |                                                  | MZ338658         | <i>Brachybacterium ginsengisoli</i> (CP023564; 98.3%)                                 | 2.9           |
|                       |                                                  | MZ338659         | <i>Brevundimonas vesicularis</i> (BCWM01000033)/ <i>B. nasdae</i> (AB071954); (99.6%) | 2.9           |
|                       |                                                  | MZ338660         | <i>Micrococcus luteus</i> (CP001628; 99.8%)                                           | 64.8          |
|                       |                                                  | MZ338661         | <i>Pseudarthrobacter sulfonivorans</i> (AF235091; 99.4%)                              | 5.9           |
|                       |                                                  | MZ338662         | <i>Pseudomonas congelans</i> (FNJH01000022; 99.9%)                                    | 2.9           |
|                       |                                                  | MZ338663         | <i>Pseudomonas lutea</i> (JRMB01000004; 99.7%)                                        | 2.9           |
| MZ338664              | <i>Streptomyces exfoliatus</i> (AB184324; 99.9%) | 8.9              |                                                                                       |               |

**Supplementary Table S4.** Sampling campaign in *Cueva de Ardales*, winter 2012. CFU/m<sup>3</sup>, accession numbers, identifications and abundances.

| Sampling              | CFU/m <sup>3</sup> air                                | Accession Number | Identification (% identity)                                                           | Abundance (%) |
|-----------------------|-------------------------------------------------------|------------------|---------------------------------------------------------------------------------------|---------------|
| Sala del Calvario     | 140±85                                                | MZ338665         | <i>Acinetobacter lwoffii</i> (AIEL01000120; 100%)                                     | 7.1           |
|                       |                                                       | MZ338666         | <i>Brevundimonas vesicularis</i> (BCWM01000033)/ <i>B. nasdae</i> (AB071954); (99.2%) | 10.7          |
|                       |                                                       | MZ338667         | <i>Micrococcus luteus</i> (CP001628; 99.7%)                                           | 57.1          |
|                       |                                                       | MZ338668         | <i>Novosphingobium panipatense</i> (jgi.1118302; 99.6%)                               | 10.7          |
|                       |                                                       | MZ338669         | <i>Paracoccus marcusii</i> (Y12703; 99.8%)                                            | 14.4          |
| Sala de las Estrellas | 40±10                                                 | MZ338670         | <i>Brevundimonas vesicularis</i> (BCWM01000033)/ <i>B. nasdae</i> (AB071954); (99.2%) | 14.3          |
|                       |                                                       | MZ338671         | <i>Micrococcus luteus</i> (CP001628; 99.7%)                                           | 57.1          |
|                       |                                                       | MZ338672         | <i>Paracoccus marcusii</i> (Y12703; 100%)                                             | 14.3          |
|                       |                                                       | MZ338673         | <i>Sporosarcina psychrophila</i> (D16277; 98.6%)                                      | 14.3          |
| End of stair          | 20±10                                                 | MZ338674         | <i>Arthrobacter citreus</i> (X80737; 100%)                                            | 66.7          |
|                       |                                                       | MZ338675         | <i>Lentzea albidocapillata</i> subsp. <i>albidocapillata</i> (JOEA01000052; 99.7%)    | 33.3          |
| Outdoor air           | 110±0                                                 | MZ338676         | <i>Arthrobacter citreus</i> (X80737; 100%)                                            | 13.6          |
|                       |                                                       | MZ338677         | <i>Arthrobacter globiformis</i> (BAEG01000072; 99.7%)                                 | 27.3          |
|                       |                                                       | MZ338678         | <i>Kocuria rosea</i> (X87756; 99.7%)                                                  | 13.6          |
|                       |                                                       | MZ338679         | <i>Massilia aurea</i> (AM231588; 99.6%)                                               | 4.5           |
|                       |                                                       | MZ338680         | <i>Novosphingobium panipatense</i> (jgi.1118302; 99.4%)                               | 13.6          |
|                       |                                                       | MZ338681         | <i>Paenibacillus purispatii</i> (EU888513; 98.7%)                                     | 4.5           |
|                       |                                                       | MZ338682         | <i>Pseudomonas koreensis</i> (AF468452; 100%)                                         | 9.2           |
|                       |                                                       | MZ338683         | <i>Rathayibacter tritici</i> (X77438; 99.5%)                                          | 9.2           |
| MZ338684              | <i>Streptomyces spinoverrucosus</i> (AB184578; 99.6%) | 4.5              |                                                                                       |               |

**Supplementary Table S5.** Sampling campaign in *Cueva del Tesoro*, spring 2011. CFU/m<sup>3</sup>, accession numbers, identifications and abundances.

| Sampling            | CFU/m <sup>3</sup> air                                                    | Accession Number | Identification (% identity)                                                           | Abundance (%) |
|---------------------|---------------------------------------------------------------------------|------------------|---------------------------------------------------------------------------------------|---------------|
| Sala de La Virgen   | 590±28                                                                    | MZ338685         | <i>Falsirhodobacter halotolerans</i> (HE662814; 99.1%)                                | 1.9           |
|                     |                                                                           | MZ338686         | <i>Microbacterium esteraromaticum</i> (Y17231; 98.4%)                                 | 1.9           |
|                     |                                                                           | MZ338687         | <i>Micrococcus luteus</i> (CP001628; 99.6%)                                           | 69.2          |
|                     |                                                                           | MZ338688         | <i>Pantoea eucalypti</i> (EF6880090; 99.7%)                                           | 2.9           |
|                     |                                                                           | MZ338689         | <i>Prolinoborus fasciculus</i> (JN175353; 99.9%)                                      | 12.5          |
|                     |                                                                           | MZ338690         | <i>Rhodococcus corynebacterioides</i> (AF430066; 98.6%)                               | 1.9           |
|                     |                                                                           | MZ338691         | <i>Schumannella luteola</i> (AB362159; 98.1%)                                         | 1.9           |
|                     |                                                                           | MZ338693         | <i>Staphylococcus borealis</i> (MT586030; 99.5%)                                      | 3.8           |
|                     |                                                                           | MZ338692         | <i>Staphylococcus equorum</i> subsp. <i>equorum</i> (AB009939; 99.1%)                 | 1.9           |
| MZ338694            | <i>Staphylococcus saprophyticus</i> subsp. <i>bovis</i> (AB233327; 99.9%) | 1.9              |                                                                                       |               |
| Sala de Lagos       | 230±10                                                                    | MZ338695         | <i>Bacillus idriensis</i> (AY904033; 99.3%)                                           | 4.7           |
|                     |                                                                           | MZ338696         | <i>Brachybacterium ginsengisoli</i> (CP023564; 99.5%)                                 | 4.7           |
|                     |                                                                           | MZ338697         | <i>Frigoribacterium faeni</i> (BJUV01000064; 99.4%)                                   | 7.0           |
|                     |                                                                           | MZ338698         | <i>Glutamicibacter halophytocola</i> (JX993762; 97.9%)                                | 7.0           |
|                     |                                                                           | MZ338699         | <i>Microbacterium phyllosphaerae</i> (AJ277840; 99.5%)                                | 16.3          |
|                     |                                                                           | MZ338700         | <i>Micrococcus endophyticus</i> (EU005372; 99.4%)                                     | 18.6          |
|                     |                                                                           | MZ338701         | <i>Paracoccus marcusii</i> (Y12703; 100%)                                             | 4.7           |
|                     |                                                                           | MZ338702         | <i>Prolinoborus fasciculus</i> (JN175353; 99.9%)                                      | 9.3           |
|                     |                                                                           | MZ338703         | <i>Pseudomonas cremoricolorata</i> (AB060137; 98.7%)                                  | 2.3           |
|                     |                                                                           | MZ338704         | <i>Psychrobacillus glaciei</i> (MN416951; 99.1%)                                      | 4.7           |
|                     |                                                                           | MZ338705         | <i>Rhodococcus corynebacterioides</i> (AF430066; 99.6%)                               | 2.3           |
|                     |                                                                           | MZ338706         | <i>Staphylococcus epidermidis</i> (UHDF01000003; 99.7%)                               | 4.7           |
|                     |                                                                           | MZ338707         | <i>Staphylococcus equorum</i> subsp. <i>equorum</i> (AB009939; 99.8%)                 | 9.3           |
|                     |                                                                           | MZ338708         | <i>Williamsia deligens</i> (AJ920290; 98.8%)                                          | 4.7           |
| Galería hacia Lagos | 460±50                                                                    | MZ338709         | <i>Brevundimonas vesicularis</i> (BCWM01000033)/ <i>B. nasdae</i> (AB071954); (99.1%) | 1.2           |
|                     |                                                                           | MZ338710         | <i>Glutamicibacter arilaitensis</i> (FQ311875; 99.7%)                                 | 15.7          |
|                     |                                                                           | MZ338711         | <i>Micrococcus luteus</i> (CP001628; 99.5%)                                           | 49.4          |
|                     |                                                                           | MZ338712         | <i>Prolinoborus fasciculus</i> (JN175353; 100%)                                       | 18.1          |
|                     |                                                                           | MZ338713         | <i>Psychrobacillus psychrodurans</i> (JGI.1085849; 99.7%)                             | 1.2           |
|                     |                                                                           | MZ338714         | <i>Rhodococcus qingshengii</i> (LRRJ01000016; 99.6%)                                  | 8.4           |
|                     |                                                                           | MZ338715         | <i>Staphylococcus borealis</i> (MT586030; 99.5%)                                      | 1.2           |
|                     |                                                                           | MZ338716         | <i>Staphylococcus equorum</i> subsp. <i>equorum</i> (AB009939; 99.6%)                 | 2.4           |
|                     |                                                                           | MZ338717         | <i>Zhihengliuella halotolerans</i> (DQ372937; 99.0%)                                  | 2.4           |

Supplementary Table S5. Continuation.

| Sampling            | CFU/m <sup>3</sup> air                                                        | Accession Number | Identification (% identity)                                                   | Abundance (%) |
|---------------------|-------------------------------------------------------------------------------|------------------|-------------------------------------------------------------------------------|---------------|
| Sala de Marco Craso | 420±50                                                                        | MZ338718         | <i>Exiguobacterium mexicanum</i> (AM072764; 99.9%)                            | 5.3           |
|                     |                                                                               | MZ338719         | <i>Glutamicibacter halophytocola</i> (JX993762; 99.3%)                        | 2.7           |
|                     |                                                                               | MZ338720         | <i>Knoellia locipacati</i> (HQ171909; 98.2%)                                  | 25.3          |
|                     |                                                                               | MZ338721         | <i>Micrococcus luteus</i> (CP001628; 99.6%)                                   | 56.0          |
|                     |                                                                               | MZ338722         | <i>Prolinoborus fasciculus</i> (JN175353; 100%)                               | 2.7           |
|                     |                                                                               | MZ338723         | <i>Staphylococcus equorum</i> subsp. <i>equorum</i> (AB009939; 99.9%)         | 6.7           |
|                     |                                                                               | MZ338724         | <i>Terribacillus goriensis</i> (DQ519571; 99.8%)                              | 1.3           |
| Sala del Volcán     | 630±30                                                                        | MZ338725         | <i>Exiguobacterium profundum</i> (AY818050; 100%)                             | 2.7           |
|                     |                                                                               | MZ338726         | <i>Glutamicibacter arilaitensis</i> (FQ311875; 99.9%)                         | 1.8           |
|                     |                                                                               | MZ338727         | <i>Massilia timonae</i> (AGZI01000009; 99.3%)                                 | 0.9           |
|                     |                                                                               | MZ338728         | <i>Micrococcus endophyticus</i> (EU005372; 99.2%)                             | 49.1          |
|                     |                                                                               | MZ338729         | <i>Micrococcus luteus</i> (CP001628; 99.6%)                                   | 36.4          |
|                     |                                                                               | MZ338730         | <i>Prolinoborus fasciculus</i> (JN175353; 99.7%)                              | 3.6           |
|                     |                                                                               | MZ338731         | <i>Pseudomonas atacamensis</i> (SSBS01000008; 99.2%)                          | 1.8           |
| MZ338732            | <i>Staphylococcus hominis</i> subsp. <i>novobiosepticus</i> (AB233326; 99.8%) | 3.6              |                                                                               |               |
| Galeria Breuil      | 200±180                                                                       | MZ338733         | <i>Knoellia locipacati</i> (HQ171909; 98.2%)                                  | 8.1           |
|                     |                                                                               | MZ338734         | <i>Metabacillus litoralis</i> (AY608605; 99.3%)                               | 2.7           |
|                     |                                                                               | MZ338735         | <i>Microbacterium hydrocarbonoxydans</i> (BCRF01000095; 99.4%)                | 2.7           |
|                     |                                                                               | MZ338736         | <i>Microbacterium oxydans</i> (Y17227; 99.2%)                                 | 2.7           |
|                     |                                                                               | MZ338737         | <i>Micrococcus endophyticus</i> (EU005372; 99.3%)                             | 35.1          |
|                     |                                                                               | MZ338738         | <i>Peribacillus loiseleuriae</i> (LFZW01000001; 98.5%)                        | 10.8          |
|                     |                                                                               | MZ338739         | <i>Pseudarthrobacter psychrotolerans</i> (MN559964; 98.5%)                    | 32.4          |
| MZ338740            | <i>Rathayibacter festucae</i> (AM410683; 99.8%)                               | 5.4              |                                                                               |               |
| Outdoor air         | 120±10                                                                        | MZ338741         | <i>Bacillus taxi</i> (MK355518; 99.6%)                                        | 17.4          |
|                     |                                                                               | MZ338742         | <i>Citricoccus nitrophenolicus</i> (GU797177; 99.6%)                          | 17.4          |
|                     |                                                                               | MZ338743         | <i>Luteimonas terrae</i> (KJ769177; 100%)                                     | 4.3           |
|                     |                                                                               | MZ338744         | <i>Metabacillus litoralis</i> (AY608605; 99.3%)                               | 4.3           |
|                     |                                                                               | MZ338745         | <i>Micrococcus luteus</i> (CP001628; 99.9%)                                   | 34.8          |
|                     |                                                                               | MZ338746         | <i>Staphylococcus epidermidis</i> (UHDF01000003; 100%)                        | 4.3           |
|                     |                                                                               | MZ338747         | <i>Staphylococcus hominis</i> subsp. <i>novobiosepticus</i> (AB233326; 99.9%) | 13.0          |
| MZ338748            | <i>Variovorax boronicumulans</i> (AB300597; 98.3%)                            | 4.3              |                                                                               |               |

**Supplementary Table S6.** Sampling campaign in *Cueva del Tesoro*, summer 2011. CFU/m<sup>3</sup>, accession numbers, identifications and abundances.

| Sampling            | CFU/m <sup>3</sup> air                                | Accession Number | Identification (% identity)                                                                                                                                                                                                     | Abundance (%) |
|---------------------|-------------------------------------------------------|------------------|---------------------------------------------------------------------------------------------------------------------------------------------------------------------------------------------------------------------------------|---------------|
| Sala de La Virgen   | 200±57                                                | MZ338749         | <i>Bacillus idriensis</i> (AY904033; 99.1%)                                                                                                                                                                                     | 39.5          |
|                     |                                                       | MZ338750         | <i>Cytobacillus oceanisediminis</i> (GQ292772; 99.4%)                                                                                                                                                                           | 2.6           |
|                     |                                                       | MZ338751         | <i>Massilia timonae</i> (AGZI01000009; 99.3%)                                                                                                                                                                                   | 2.6           |
|                     |                                                       | MZ338752         | <i>Micrococcus luteus</i> (CP001628; 99.7%)                                                                                                                                                                                     | 44.7          |
|                     |                                                       | MZ338753         | <i>Streptomyces anulatus</i> (DQ026637)/ <i>S. fulvissimus</i> (CP005080)/ <i>S. microflavus</i> (AB184284)/ <i>S. cyaneofuscatus</i> (JOEM01000050)/ <i>S. halstedii</i> (AB184142)/ <i>S. fulvorobeus</i> (AB184711); (99.4%) | 10.5          |
| Sala de Lagos       | 110±40                                                | MZ338754         | <i>Knoellia locipacati</i> (HQ171909; 98.3%)                                                                                                                                                                                    | 28.6          |
|                     |                                                       | MZ338755         | <i>Massilia timonae</i> (U54470; 99.3%)                                                                                                                                                                                         | 4.8           |
|                     |                                                       | MZ338756         | <i>Micrococcus luteus</i> (CP001628; 99.5%)                                                                                                                                                                                     | 38.1          |
|                     |                                                       | MZ338757         | <i>Micrococcus terreus</i> (jgi.1058018; 99.8%)                                                                                                                                                                                 | 4.8           |
|                     |                                                       | MZ338758         | <i>Pseudomonas psychrotolerans</i> (FMWB01000061)/ <i>P. oryzihabitans</i> (BBIT01000012); (99.4%)                                                                                                                              | 9.5           |
|                     |                                                       | MZ338759         | <i>Zhihengliuella halotolerans</i> (DQ372937; 99.7%)                                                                                                                                                                            | 14.3          |
| Galería hacia Lagos | 640±370                                               | LN774332         | <i>Bacillus omubensis</i> (NSEB01000017; 99.7%)                                                                                                                                                                                 | 2.7           |
|                     |                                                       | MZ338760         | <i>Bacillus toyonensis</i> (CP006863)/ <i>B. mobilis</i> (MACF01000036); (99.9%)                                                                                                                                                | 0.9           |
|                     |                                                       | MZ338761         | <i>Glutamicibacter arilaitensis</i> (FQ311875; 100%)                                                                                                                                                                            | 0.9           |
|                     |                                                       | MZ338762         | <i>Knoellia subterranea</i> (AVPK01000001; 98%)                                                                                                                                                                                 | 73.2          |
|                     |                                                       | MZ338763         | <i>Micrococcus antarcticus</i> (AJ005932; 99.3%)                                                                                                                                                                                | 0.9           |
|                     |                                                       | MZ338764         | <i>Micrococcus luteus</i> (CP001628; 99.6%)                                                                                                                                                                                     | 8.9           |
|                     |                                                       | MZ338765         | <i>Sphingomonas sanguinis</i> (BCTY01000091; 99.2%)                                                                                                                                                                             | 1.8           |
|                     |                                                       | MZ338766         | <i>Staphylococcus caprae</i> (AB009935; 98.5%)                                                                                                                                                                                  | 1.8           |
|                     |                                                       | MZ338767         | <i>Staphylococcus cohnii</i> subsp. <i>urealyticus</i> (AB009936; 99.7%)                                                                                                                                                        | 3.6           |
| MZ338768            | <i>Streptomyces exfoliatus</i> (JNZP01000081; 99.7%)  | 5.4              |                                                                                                                                                                                                                                 |               |
| Sala de Marco Craso | 280±90                                                | MZ338769         | <i>Acinetobacter oryzae</i> (GU954428; 99.1%)                                                                                                                                                                                   | 3.9           |
|                     |                                                       | MZ338770         | <i>Brevundimonas vesicularis</i> (BCWM01000033)/ <i>B. nasdae</i> (AB071954); (99.0%)                                                                                                                                           | 2.0           |
|                     |                                                       | MZ338771         | <i>Cytobacillus horneckiae</i> (FR749913; 100%)                                                                                                                                                                                 | 2.0           |
|                     |                                                       | MZ338772         | <i>Massilia suwonensis</i> (FJ969487; 98.8%)                                                                                                                                                                                    | 7.8           |
|                     |                                                       | MZ338773         | <i>Massilia timonae</i> (AGZI01000009; 99.1%)                                                                                                                                                                                   | 2.0           |
|                     |                                                       | MZ338774         | <i>Microbacterium phyllosphaerae</i> (AJ277840; 98.9%)                                                                                                                                                                          | 3.9           |
|                     |                                                       | MZ338775         | <i>Micrococcus endophyticus</i> (EU005372; 99.3%)                                                                                                                                                                               | 66.7          |
|                     |                                                       | MZ338776         | <i>Paracoccus aerius</i> (KX664462; 99.7%)                                                                                                                                                                                      | 2.0           |
| MZ338777            | <i>Pseudomonas kuykendallii</i> (FNNU01000014; 99.3%) | 9.8              |                                                                                                                                                                                                                                 |               |



Supplementary Table S6. Continuation.

| Sampling        | CFU/m <sup>3</sup> air                              | Accession Number | Identification (% identity)                                               | Abundance (%) |
|-----------------|-----------------------------------------------------|------------------|---------------------------------------------------------------------------|---------------|
| Sala del Volcán | 420±60                                              | MZ338778         | <i>Glutamicibacter arilaitensis</i> (FQ311875; 99.7%)                     | 6.7           |
|                 |                                                     | MZ338779         | <i>Massilia oculi</i> (FR773700; 99.4%)                                   | 4.0           |
|                 |                                                     | MZ338780         | <i>Micrococcus endophyticus</i> (EU005372; 99.4%)                         | 60.0          |
|                 |                                                     | MZ338781         | <i>Staphylococcus cohnii</i> subsp. <i>cohnii</i> (D83361; 100%)          | 5.3           |
|                 |                                                     | MZ338782         | <i>Staphylococcus cohnii</i> subsp. <i>urealyticus</i> (AB009936; 100%)   | 2.7           |
|                 |                                                     | MZ338783         | <i>Staphylococcus hominis</i> subsp. <i>hominis</i> (X66101; 99.4%)       | 5.3           |
|                 |                                                     | MZ338784         | <i>Staphylococcus saprophyticus</i> subsp. <i>bovis</i> (AB233327; 99.6%) | 8.0           |
|                 |                                                     | MZ338785         | <i>Streptomyces exfoliatus</i> (JNZP01000081; 99.2%)                      | 2.7           |
|                 |                                                     | MZ338786         | <i>Streptomyces virginiae</i> (JOAK01000082; 99.8%)                       | 4.0           |
| MZ338787        | <i>Ureibacillus chungkukjangi</i> (JX217747; 98.2%) | 1.3              |                                                                           |               |
| Galería Breuil  | 480±160                                             | MZ338788         | <i>Acinetobacter johnsonii</i> (APON01000005; 98.5%)                      | 8.1           |
|                 |                                                     | MZ338789         | <i>Bacillus licheniformis</i> (AE017333; 99.9%)                           | 2.3           |
|                 |                                                     | MZ338790         | <i>Glutamicibacter mysorens</i> (AJ639831; 99.7%)                         | 44.2          |
|                 |                                                     | MZ338791         | <i>Mesobacillus thioparans</i> (DQ371431; 98.8%)                          | 3.5           |
|                 |                                                     | MZ338792         | <i>Microbacterium aerolatum</i> (BJUW01000027; 99.3%)                     | 4.7           |
|                 |                                                     | MZ338793         | <i>Micrococcus luteus</i> (CP001628; 99.3%)                               | 29.1          |
|                 |                                                     | MZ338794         | <i>Peribacillus loiseleuriae</i> (LFZW01000001; 98.6%)                    | 2.3           |
|                 |                                                     | MZ338795         | <i>Pseudomonas xanthomarina</i> (AB176954; 99.0%)                         | 5.8           |
| Outdoor air     | 140±10                                              | MZ338796         | <i>Acinetobacter johnsonii</i> (APON01000005; 98.7%)                      | 3.7           |
|                 |                                                     | MZ338797         | <i>Brevibacterium aurantiacum</i> (X76566; 98.8%)                         | 22.2          |
|                 |                                                     | MZ338798         | <i>Glutamicibacter halophytocola</i> (JX993762; 99.2%)                    | 3.7           |
|                 |                                                     | MZ338799         | <i>Glutamicibacter mysorens</i> (AJ639831; 99.6%)                         | 18.5          |
|                 |                                                     | MZ338800         | <i>Metabacillus litoralis</i> (AY608605; 99.4%)                           | 3.7           |
|                 |                                                     | MZ338801         | <i>Microbacterium oleivorans</i> (BCRG01000019; 99.9%)                    | 3.7           |
|                 |                                                     | MZ338802         | <i>Micrococcus endophyticus</i> (EU005372; 99.4%)                         | 3.7           |
|                 |                                                     | MZ338803         | <i>Pseudarthrobacter psychrotolerans</i> (MN559964; 99.1%)                | 18.5          |
|                 |                                                     | MZ338804         | <i>Sphingomonas yunnanensis</i> (AY894691; 98.9%)                         | 3.7           |
|                 |                                                     | MZ338805         | <i>Streptomyces exfoliatus</i> (JNZP01000081; 99.5%)                      | 3.7           |
|                 |                                                     | MZ338806         | <i>Zhihengliuella halotolerans</i> (DQ372937; 99.7%)                      | 14.8          |

**Supplementary Table S7.** Sampling campaign in *Cueva del Tesoro*, autumn 2011. CFU/m<sup>3</sup>, accession numbers, identifications and abundances.

| Sampling            | CFU/m <sup>3</sup> air                                 | Accession Number | Identification (% identity)                                                                                                                     | Abundance (%) |
|---------------------|--------------------------------------------------------|------------------|-------------------------------------------------------------------------------------------------------------------------------------------------|---------------|
| Sala de La Virgen   | 280±35                                                 | MZ338807         | <i>Bacillus proteolyticus</i> (MACH01000033; 98.0%)                                                                                             | 2.0           |
|                     |                                                        | MZ338808         | <i>Corynebacterium xerosis</i> (LAYS01000008; 99.9%)                                                                                            | 3.9           |
|                     |                                                        | MZ338809         | <i>Jeotgalicoccus halophilus</i> (FJ386517; 100%)                                                                                               | 29.4          |
|                     |                                                        | MZ338810         | <i>Kocuria rosea</i> (X87756; 99.2%)                                                                                                            | 9.8           |
|                     |                                                        | MZ338811         | <i>Micrococcus luteus</i> (CP001628; 99.9%)                                                                                                     | 29.4          |
|                     |                                                        | MZ338812         | <i>Novosphingobium panipatense</i> (jgi.1118302; 99.6%)                                                                                         | 7.8           |
|                     |                                                        | MZ338813         | <i>Paenisporosarcina quisquiliarum</i> (DQ333897; 98.8%)                                                                                        | 7.8           |
|                     |                                                        | MZ338814         | <i>Rhodococcus zopfii</i> (BCXI01000001; 98.7%)                                                                                                 | 2.0           |
| MZ338815            | <i>Streptomyces prasinus</i> (LIRH01000162; 100%)      | 7.8              |                                                                                                                                                 |               |
| Sala de Lagos       | 140±30                                                 | MZ338816         | <i>Arenivirga flava</i> (LC203064; 99.5%)                                                                                                       | 9.5           |
|                     |                                                        | MZ338817         | <i>Arthrobacter pityocampae</i> (EU855749; 99.2%)                                                                                               | 4.8           |
|                     |                                                        | MZ338818         | <i>Brevundimonas vesicularis</i> (BCWM01000033)/ <i>B. nasdae</i> (AB071954); (99.6%)                                                           | 4.8           |
|                     |                                                        | MZ338819         | <i>Massilia niabensis</i> (EU808006; 98.9%)                                                                                                     | 4.8           |
|                     |                                                        | MZ338820         | <i>Microbacterium phyllosphaerae</i> (AJ277840; 99.8%)                                                                                          | 4.8           |
|                     |                                                        | MZ338821         | <i>Micrococcus luteus</i> (CP001628; 99.8%)                                                                                                     | 9.5           |
|                     |                                                        | MZ338822         | <i>Serratia liquefaciens</i> (CP006252; 99.9%)                                                                                                  | 33.3          |
|                     |                                                        | MZ338823         | <i>Staphylococcus equorum</i> subsp. <i>equorum</i> (AB009939; 100%)                                                                            | 4.8           |
|                     |                                                        | MZ338824         | <i>Staphylococcus xylosus</i> (MRZO01000018; 99.9%)                                                                                             | 9.5           |
| MZ338825            | <i>Streptomyces longisporoflavus</i> (AB184220; 99.9%) | 14.3             |                                                                                                                                                 |               |
| Galería hacia Lagos | 110±10                                                 | MZ338826         | <i>Arthrobacter pokkali</i> (KM507333; 99.2%)                                                                                                   | 23.8          |
|                     |                                                        | MZ338827         | <i>Arthrobacter tumbae</i> (AJ315069; 100%)                                                                                                     | 14.3          |
|                     |                                                        | MZ338828         | <i>Kocuria rosea</i> (X87756; 99.8%)                                                                                                            | 19.0          |
|                     |                                                        | MZ338829         | <i>Microbacterium oleivorans</i> (BCRG01000019; 99.4%)                                                                                          | 14.3          |
|                     |                                                        | MZ338830         | <i>Sporosarcina luteola</i> (AB473560; 99.9%)                                                                                                   | 23.8          |
|                     |                                                        | MZ338831         | <i>Streptomyces xantholiticus</i> (AB184349; 99.2%)                                                                                             | 4.8           |
| Sala de Marco Craso | 250±10                                                 | MZ338833         | <i>Bacillus tropicus</i> (MACG01000025; 99.8%)                                                                                                  | 14.6          |
|                     |                                                        | MZ338832         | <i>Bacillus wiedmannii</i> (LOBC01000053)/ <i>B. albus</i> (MAOE01000087)/ <i>B. luti</i> (MACI01000041)/ <i>B. fungorum</i> (MG601116); (100%) | 10.4          |
|                     |                                                        | MZ338834         | <i>Glutamicibacter arilaitensis</i> (FQ311875; 100%)                                                                                            | 12.5          |
|                     |                                                        | MZ338835         | <i>Kocuria rosea</i> (X87756; 99.8%)                                                                                                            | 10.4          |
|                     |                                                        | MZ338836         | <i>Microbacterium esteraromaticum</i> (Y17231; 99.8%)                                                                                           | 20.8          |
|                     |                                                        | MZ338837         | <i>Prolinoborus fasciculus</i> (JN175353; 99.9%)                                                                                                | 8.3           |
|                     |                                                        | MZ338838         | <i>Pseudoclavibacter helvolus</i> (X77440; 99.8%)                                                                                               | 6.3           |
|                     |                                                        | MZ338839         | <i>Streptomyces anulatus</i> (DQ026637; 99.7%)                                                                                                  | 6.3           |
|                     |                                                        | MZ338840         | <i>Streptomyces exfoliatus</i> (AB184324; 99.9%)                                                                                                | 10.4          |

Supplementary Table S7. Continuation.

| Sampling        | CFU/m <sup>3</sup> air                           | Accession Number | Identification (% identity)                                                        | Abundance (%) |
|-----------------|--------------------------------------------------|------------------|------------------------------------------------------------------------------------|---------------|
| Sala del Volcán | 200±10                                           | MZ338841         | <i>Glutamicibacter arilaitensis</i> (FQ311875; 99.7%)                              | 7.9           |
|                 |                                                  | MZ338842         | <i>Lentzea albidocapillata</i> subsp. <i>albidocapillata</i> (JOEA01000052; 99.2%) | 2.6           |
|                 |                                                  | MZ338843         | <i>Metabacillus litoralis</i> (AY608605; 99.3%)                                    | 7.9           |
|                 |                                                  | MZ338844         | <i>Micrococcus luteus</i> (CP001628; 99.8%)                                        | 68.4          |
|                 |                                                  | MZ338845         | <i>Paenisporosarcina quisquiliarum</i> (DQ333897; 99.8%)                           | 2.6           |
|                 |                                                  | MZ338846         | <i>Pseudarthrobacter oxydans</i> (X83408; 99.8%)                                   | 10.5          |
| Galería Breuil  | 100±70                                           | MZ338847         | <i>Bacillus aryabhatai</i> (EF114313; 100%)                                        | 20.0          |
|                 |                                                  | MZ338848         | <i>Micrococcus luteus</i> (CP001628; 99.8%)                                        | 20.0          |
|                 |                                                  | MZ338849         | <i>Streptomyces kurssanovii</i> (AB184325; 99.9%)                                  | 60.0          |
| Outdoor air     | 340±20                                           | MZ338850         | <i>Bacillus humi</i> (AJ627210; 99.0%)                                             | 6.3           |
|                 |                                                  | MZ338851         | <i>Glutamicibacter arilaitensis</i> (FQ311875; 99.7%)                              | 7.9           |
|                 |                                                  | MZ338852         | <i>Microbacterium hydrocarbonoxydans</i> (BCRF01000095; 99.9%)                     | 15.9          |
|                 |                                                  | MZ338853         | <i>Micrococcus luteus</i> (CP001628; 99.8%)                                        | 41.3          |
|                 |                                                  | MZ338854         | <i>Neobacillus bataviensis</i> (AJ542508)/ <i>N. soli</i> (BCVI01000121); (99.1%)  | 4.8           |
|                 |                                                  | MZ338855         | <i>Pseudarthrobacter oxydans</i> (X83408; 99.7%)                                   | 3.2           |
|                 |                                                  | MZ338856         | <i>Pseudomonas mediterranea</i> (AUPB01000004; 99.0%)                              | 4.8           |
|                 |                                                  | MZ338857         | <i>Sphingomonas aerolata</i> (AJ429240; 99.9%)                                     | 1.6           |
|                 |                                                  | MZ338858         | <i>Streptomyces exfoliatus</i> (JNZP01000081; 99.5%)                               | 9.5           |
| MZ338859        | <i>Streptomyces lateritius</i> (AJ781326; 99.2%) | 4.8              |                                                                                    |               |

**Supplementary Table S8.** Sampling campaign in *Cueva del Tesoro*, winter 2012. CFU/m<sup>3</sup>, accession numbers, identifications and abundances.

| Sampling            | CFU/m <sup>3</sup> air                              | Accession Number | Identification (% identity)                                                                                                  | Abundance (%) |
|---------------------|-----------------------------------------------------|------------------|------------------------------------------------------------------------------------------------------------------------------|---------------|
| Sala de la Virgen   | 250±0                                               | MZ338860         | <i>Acinetobacter lwoffii</i> (AIEL01000120; 100%)                                                                            | 4.2           |
|                     |                                                     | MZ338861         | <i>Arthrobacter agilis</i> (X80748; 99.8%)                                                                                   | 2.1           |
|                     |                                                     | MZ338862         | <i>Bacillus aryabhatai</i> (EF114313; 100%)                                                                                  | 4.2           |
|                     |                                                     | MZ338863         | <i>Bhargavaea cecembensis</i> (AM286423; 99.5%)                                                                              | 8.3           |
|                     |                                                     | MZ338864         | <i>Kocuria polaris</i> (JSUH01000031; 99.7%)                                                                                 | 4.2           |
|                     |                                                     | MZ338865         | <i>Leuconostoc mesenteroides</i> subsp. <i>mesenteroides</i> (CP000414; 99.9%)                                               | 6.3           |
|                     |                                                     | MZ338866         | <i>Lysinibacillus xylanilyticus</i> (FJ477040; 99.3%)                                                                        | 4.2           |
|                     |                                                     | MZ338867         | <i>Micrococcus luteus</i> (CP001628; 99.8%)                                                                                  | 22.9          |
|                     |                                                     | MZ338868         | <i>Okibacterium fritillariae</i> (FUZP01000004; 99.9%)                                                                       | 16.7          |
|                     |                                                     | MZ338869         | <i>Paenibacillus amylolyticus</i> (BIMJ01000009; 100%)                                                                       | 10.4          |
|                     |                                                     | MZ338870         | <i>Pantoea dispersa</i> (DQ504305; 98.8%)                                                                                    | 2.1           |
|                     |                                                     | MZ338871         | <i>Sphingomonas olei</i> (KX672814; 100%)                                                                                    | 4.2           |
|                     |                                                     | MZ338872         | <i>Streptomyces cremeus</i> (AB184124; 98.9%)                                                                                | 6.3           |
| MZ338873            | <i>Streptomyces koyangensis</i> (CP031742; 99.5%)   | 4.2              |                                                                                                                              |               |
| Sala de Lagos       | 130±40                                              | MZ338874         | <i>Frigoribacterium faeni</i> (BJUV01000064; 99.5%)                                                                          | 8.0           |
|                     |                                                     | MZ338875         | <i>Glutamicibacter nicotianae</i> (BJNE01000038; 98.1 %)                                                                     | 32.0          |
|                     |                                                     | MZ338876         | <i>Glutamicibacter soli</i> (EF660748; 98.9%)                                                                                | 16.0          |
|                     |                                                     | MZ338877         | <i>Paenibacillus amylolyticus</i> (BIMJ01000009; 100%)                                                                       | 12.0          |
|                     |                                                     | MZ338878         | <i>Planococcus ruber</i> (KX950835; 98.7%)                                                                                   | 4.0           |
|                     |                                                     | MZ338879         | <i>Pseudarthrobacter siccitolerans</i> (CAQI01000001; 100%)                                                                  | 16.0          |
| MZ338880            | <i>Pseudomonas rhizosphaerae</i> (CP009533; 99.8%)  | 12.0             |                                                                                                                              |               |
| Galería hacia Lagos | 100±30                                              | MZ338881         | <i>Arthrobacter crystallopoietes</i> (FNKH01000002; 99.2%)                                                                   | 15.0          |
|                     |                                                     | MZ338882         | <i>Bhargavaea cecembensis</i> (AM286423; 99.5%)                                                                              | 20.0          |
|                     |                                                     | MZ338883         | <i>Corynebacterium casei</i> (CP004350; 100%)                                                                                | 10.0          |
|                     |                                                     | MZ338884         | <i>Kocuria gwangalliensis</i> (EU286964; 99.4%)                                                                              | 5.0           |
|                     |                                                     | MZ338885         | <i>Kocuria polaris</i> (JSUH01000031; 99.7%)                                                                                 | 10.0          |
|                     |                                                     | MZ338886         | <i>Microbacterium paraoxydans</i> (BCRH01000180; 99.7%)                                                                      | 10.0          |
|                     |                                                     | MZ338887         | <i>Micrococcus luteus</i> (CP001628; 99.8%)                                                                                  | 15.0          |
|                     |                                                     | MZ338888         | <i>Streptomyces rochei</i> (MUMD01000370)/ <i>S. vinaceusdrappus</i> (AY999929)/ <i>S. enissocaesilis</i> (DQ026641); (100%) | 10.0          |
| MZ338889            | <i>Streptomyces xantholiticus</i> (AB184349; 99.1%) | 5.0              |                                                                                                                              |               |

**Supplementary Table S8. Continuation.**

| Sampling            | CFU/m <sup>3</sup> air                              | Accession Number | Identification (% identity)                                                                                                                                   | Abundance (%) |
|---------------------|-----------------------------------------------------|------------------|---------------------------------------------------------------------------------------------------------------------------------------------------------------|---------------|
| Sala de Marco Craso | 280±10                                              | MZ338890         | <i>Arthrobacter pascens</i> (X80740; 98.2%)                                                                                                                   | 13.7          |
|                     |                                                     | MZ338891         | <i>Bacillus cereus</i> (AE016877)/ <i>B. paramycooides</i> (MAOI01000012)/ <i>B. paranthracis</i> (MACE01000012)/ <i>B. nitratreducens</i> (KJ812430); (100%) | 7.8           |
|                     |                                                     | MZ338892         | <i>Bhargavaea cecembensis</i> (AM286423; 99.5%)                                                                                                               | 5.9           |
|                     |                                                     | MZ338893         | <i>Kocuria gwangalliensis</i> (EU286964; 99.9%)                                                                                                               | 2.0           |
|                     |                                                     | MZ338894         | <i>Lysinibacillus odysseyi</i> (AF526913; 98.7%)                                                                                                              | 9.8           |
|                     |                                                     | MZ338895         | <i>Microbacterium paraoxydans</i> (BCRH01000180; 100%)                                                                                                        | 3.9           |
|                     |                                                     | MZ338896         | <i>Micrococcus luteus</i> (CP001628; 99.8%)                                                                                                                   | 15.7          |
|                     |                                                     | MZ338897         | <i>Paracoccus marcusii</i> (Y12703)/ <i>P. carotinifaciens</i> (AB006899); (100%)                                                                             | 9.8           |
|                     |                                                     | MZ338898         | <i>Planococcus ruber</i> (KX950835; 98.7%)                                                                                                                    | 2.0           |
|                     |                                                     | MZ338899         | <i>Psychrobacillus psychrodurans</i> (jgi.1085849; 97.6%)                                                                                                     | 3.9           |
|                     |                                                     | MZ338900         | <i>Staphylococcus epidermidis</i> (UHDF01000003; 100%)                                                                                                        | 5.9           |
|                     |                                                     | MZ338901         | <i>Staphylococcus equorum</i> subsp. <i>equorum</i> (AB009939; 100%)                                                                                          | 2.0           |
|                     |                                                     | MZ338902         | <i>Streptomyces prasinus</i> (LIRH01000162; 99.9%)                                                                                                            | 5.9           |
| MZ338903            | <i>Streptomyces xantholiticus</i> (AB184349; 99.2%) | 11.8             |                                                                                                                                                               |               |
| Sala del Volcán     | 170±10                                              | MZ338904         | <i>Alcaligenes faecalis</i> subsp. <i>phenolicus</i> (AUBT01000026; 99.7%)                                                                                    | 6.3           |
|                     |                                                     | MZ338905         | <i>Brevundimonas vesicularis</i> (BCWM01000033)/ <i>B. nasdae</i> (AB071954); (99.5%)                                                                         | 6.3           |
|                     |                                                     | MZ338906         | <i>Metabacillus indicus</i> (JGVU01000003; 100%)                                                                                                              | 12.1          |
|                     |                                                     | MZ338907         | <i>Metabacillus litoralis</i> (AY608605; 99.1%)                                                                                                               | 3.1           |
|                     |                                                     | MZ338908         | <i>Micrococcus luteus</i> (CP001628; 99.8%)                                                                                                                   | 40.6          |
|                     |                                                     | MZ338909         | <i>Paenibacillus amylolyticus</i> (BIMJ01000009; 100%)                                                                                                        | 3.1           |
|                     |                                                     | MZ338910         | <i>Streptomyces cinereoruber</i> subsp. <i>cinereoruber</i> (AB184121; 100%)                                                                                  | 3.1           |
|                     |                                                     | MZ338911         | <i>Streptomyces kurssanovii</i> (AB184325; 99.1%)                                                                                                             | 25.0          |
| Galeria Breuil      | 200±40                                              | MZ338912         | <i>Agrobacterium cavarae</i> (MK940276; 99.8%)                                                                                                                | 5.9           |
|                     |                                                     | MZ338913         | <i>Aureimonas altamirensis</i> (BBWQ01000019; 100%)                                                                                                           | 5.9           |
|                     |                                                     | MZ338914         | <i>Bacillus foraminis</i> (AJ717382; 99.8%)                                                                                                                   | 8.8           |
|                     |                                                     | MZ338915         | <i>Bacillus halmपालुस</i> (KV917375; 99.1%)                                                                                                                   | 8.8           |
|                     |                                                     | MZ338916         | <i>Brevundimonas vesicularis</i> (BCWM01000033)/ <i>B. nasdae</i> (AB071954); (99.5%)                                                                         | 5.9           |
|                     |                                                     | MZ338917         | <i>Glutamicibacter arilaitensis</i> (FQ311875; 99.2%)                                                                                                         | 2.9           |
|                     |                                                     | MZ338918         | <i>Massilia oculi</i> (FR773700; 100%)                                                                                                                        | 2.9           |
|                     |                                                     | MZ338919         | <i>Metabacillus litoralis</i> (AY608605; 99.2%)                                                                                                               | 2.9           |
|                     |                                                     | MZ338920         | <i>Microbacterium yannicii</i> (FN547412; 99.0%)                                                                                                              | 2.9           |

**Supplementary Table S8. Continuation.**

| Sampling       | CFU/m <sup>3</sup> air                             | Accession Number | Identification (% identity)                             | Abundance (%) |
|----------------|----------------------------------------------------|------------------|---------------------------------------------------------|---------------|
| Galeria Breuil |                                                    | MZ338921         | <i>Micrococcus luteus</i> (CP001628; 99.8%)             | 26.5          |
|                |                                                    | MZ338922         | <i>Pseudarthrobacter oxydans</i> (X83408; 99.8%)        | 8.8           |
|                |                                                    | MZ338923         | <i>Pseudomonas congelans</i> (FNJH01000022; 98.4%)      | 11.8          |
|                |                                                    | MZ338924         | <i>Psychrobacillus insolitus</i> (AM980508; 98.8%)      | 2.9           |
|                |                                                    | MZ338925         | <i>Rhodococcus corynebacterioides</i> (AF430066; 99.6%) | 2.9           |
| Outdoor air    | 230±100                                            | MZ338926         | <i>Acinetobacter lwoffii</i> (AIEL01000120; 99.8%)      | 11.4          |
|                |                                                    | MZ338927         | <i>Bacillus badius</i> (JXLP01000009; 99.2%)            | 2.3           |
|                |                                                    | MZ338928         | <i>Bacillus cereus</i> (AE016877; 100%)                 | 9.1           |
|                |                                                    | MZ338929         | <i>Cellulosimicrobium funkei</i> (AY501364; 99.8%)      | 6.8           |
|                |                                                    | MZ338930         | <i>Citricoccus nitrophenolicus</i> (GU797177; 98.7%)    | 6.8           |
|                |                                                    | MZ338931         | <i>Micrococcus luteus</i> (CP001628; 99.7%)             | 20.5          |
|                |                                                    | MZ338932         | <i>Peribacillus simplex</i> (AB363738; 99.8%)           | 9.1           |
|                |                                                    | MZ338933         | <i>Planococcus donghaensis</i> (CP016544; 98.4%)        | 2.3           |
|                |                                                    | MZ338934         | <i>Pseudarthrobacter scleromae</i> (AF330692; 98.9%)    | 15.9          |
| MZ338935       | <i>Ureibacillus sinduriensis</i> (FJ169465; 99.6%) | 15.9             |                                                         |               |

**Supplementary Table S9.** Sampling campaign in *Gruta de las Maravillas*, spring 2011. CFU/m<sup>3</sup>, accession numbers, identifications and abundances.

| Sampling             | CFU/m <sup>3</sup> air                           | Accession Number | Identification (% identity)                                                           | Abundance (%) |
|----------------------|--------------------------------------------------|------------------|---------------------------------------------------------------------------------------|---------------|
| Sala de Las Conchas  | 100±42                                           | MZ338936         | <i>Acinetobacter lwoffii</i> (AIEL01000120; 100%)                                     | 10.0          |
|                      |                                                  | MZ338937         | <i>Corynebacterium xerosis</i> (LAYS01000008; 99.4%)                                  | 15.0          |
|                      |                                                  | MZ338938         | <i>Micrococcus luteus</i> (CP001628; 98.8%)                                           | 45.0          |
|                      |                                                  | MZ338939         | <i>Pseudomonas asplenii</i> (LT629777; 99.1%)                                         | 5.0           |
|                      |                                                  | MZ338940         | <i>Staphylococcus borealis</i> (MT586030; 99.9%)                                      | 15.0          |
|                      |                                                  | MZ338941         | <i>Staphylococcus hominis</i> subsp. <i>novobiosepticus</i> (AB233326; 99.8%)         | 10.0          |
| Sala del Lago 2      | 710±160                                          | MZ338942         | <i>Acinetobacter johnsonii</i> (APON01000005; 99.2%)                                  | 10.7          |
|                      |                                                  | MZ338943         | <i>Aerococcus urinaeequi</i> (CP014162; 99.2%)                                        | 24.0          |
|                      |                                                  | MZ338944         | <i>Kocuria tytonis</i> (MG547562; 99.6%)                                              | 9.1           |
|                      |                                                  | MZ338945         | <i>Massilia suwonensis</i> (FJ969487; 99.1%)                                          | 0.8           |
|                      |                                                  | MZ338946         | <i>Microbacterium foliorum</i> (JYIU01000006; 98.7%)                                  | 5.0           |
|                      |                                                  | MZ338947         | <i>Micrococcus antarcticus</i> (AJ005932; 99.2%)                                      | 4.1           |
|                      |                                                  | MZ338948         | <i>Micrococcus endophyticus</i> (EU005372; 99.1%)                                     | 35.5          |
|                      |                                                  | MZ338949         | <i>Prolinoborus fasciculus</i> (JN175353; 99.6%)                                      | 2.5           |
| MZ338950             | <i>Staphylococcus borealis</i> (MT586030; 99.2%) | 8.3              |                                                                                       |               |
| Sala del Volcán      | 140±170                                          | MZ338951         | <i>Aerococcus urinaeequi</i> (CP014162; 99.6%)                                        | 7.1           |
|                      |                                                  | MZ338952         | <i>Agrococcus baldri</i> (FOZN01000001; 98.2%)                                        | 3.6           |
|                      |                                                  | MZ338953         | <i>Bacillus vietnamensis</i> (AB099708; 99.3%)                                        | 21.4          |
|                      |                                                  | MZ338954         | <i>Corynebacterium casei</i> (CP004350; 99.7%)                                        | 3.6           |
|                      |                                                  | MZ338955         | <i>Curtobacterium flaccumfaciens</i> (AJ312209; 99.8%)                                | 10.7          |
|                      |                                                  | MZ338956         | <i>Metabacillus litoralis</i> (AY608605; 98.8%)                                       | 3.6           |
|                      |                                                  | MZ338957         | <i>Micrococcus endophyticus</i> (EU005372; 99.1%)                                     | 50.0          |
| Sala de Los Desnudos | 200±10                                           | MZ338958         | <i>Brevundimonas vesicularis</i> (BCWM01000033)/ <i>B. nasdae</i> (AB071954); (99.0%) | 26.3          |
|                      |                                                  | MZ338959         | <i>Micrococcus antarcticus</i> (AJ005932; 99.1%)                                      | 15.8          |
|                      |                                                  | MZ338960         | <i>Micrococcus endophyticus</i> (EU005372; 99.1%)                                     | 15.8          |
|                      |                                                  | MZ338961         | <i>Prolinoborus fasciculus</i> (JN175353; 99.9%)                                      | 13.2          |
|                      |                                                  | MZ338962         | <i>Pseudomonas stutzeri</i> (CP002881; 99.9%)                                         | 5.3           |
|                      |                                                  | MZ338963         | <i>Staphylococcus haemolyticus</i> (LILF01000056; 99.6%)                              | 21.1          |
|                      |                                                  | MZ338964         | <i>Staphylococcus saprophyticus</i> subsp. <i>bovis</i> (AB233327; 99.8%)             | 2.6           |

Supplementary Table S9. Continuation.

| Sampling     | CFU/m <sup>3</sup> air | Accession Number | Identification (% identity)                                               | Abundance (%) |
|--------------|------------------------|------------------|---------------------------------------------------------------------------|---------------|
| Exit Passage | 250±60                 | MZ338965         | <i>Aerococcus urinaeequi</i> (CP014162; 100%)                             | 6.3           |
|              |                        | MZ338966         | <i>Brevundimonas diminuta</i> (GL883089; 99.4%)                           | 16.7          |
|              |                        | MZ338967         | <i>Micrococcus endophyticus</i> (EU005372; 99.2%)                         | 58.3          |
|              |                        | MZ338968         | <i>Psychrobacter celer</i> (AY842259; 99.9%)                              | 14.6          |
|              |                        | MZ338969         | <i>Rhodococcus fascians</i> (JMEN01000010; 99.5%)                         | 2.1           |
|              |                        | MZ338970         | <i>Staphylococcus saprophyticus</i> subsp. <i>bovis</i> (AB233327; 99.9%) | 2.1           |
| Outdoor air  | 210±70                 | MZ338971         | <i>Acinetobacter halotolerans</i> (KT032155; 98.5%)                       | 21.6          |
|              |                        | MZ338972         | <i>Frigoribacterium faeni</i> (BJUV01000064; 99.9%)                       | 21.6          |
|              |                        | MZ338973         | <i>Massilia timonae</i> (AGZI01000009; 99.5%)                             | 2.7           |
|              |                        | MZ338974         | <i>Micrococcus endophyticus</i> (EU005372; 99.2%)                         | 16.2          |
|              |                        | MZ338975         | <i>Micrococcus luteus</i> (CP001628; 99.9%)                               | 24.3          |
|              |                        | MZ338976         | <i>Pseudomonas simiae</i> (AJ936933; 99.8%)                               | 5.4           |
|              |                        | MZ338977         | <i>Staphylococcus edaphicus</i> (KY315825; 100%)                          | 2.7           |
|              |                        | MZ338978         | <i>Staphylococcus equorum</i> subsp. <i>equorum</i> (AB009939; 99.3%)     | 5.4           |



**Supplementary Table S10.** Sampling campaign in *Gruta de las Maravillas*, summer 2011. CFU/m<sup>3</sup>, accession numbers, identifications and abundances.

| Sampling             | CFU/m <sup>3</sup> air                                         | Accession Number | Identification (% identity)                                                   | Abundance (%) |
|----------------------|----------------------------------------------------------------|------------------|-------------------------------------------------------------------------------|---------------|
| Sala de Las Conchas  | 60±7                                                           | MZ338979         | <i>Kocuria palustris</i> (Y16263; 100%)                                       | 27.3          |
|                      |                                                                | MZ338980         | <i>Micrococcus endophyticus</i> (EU005372; 99.2%)                             | 36.4          |
|                      |                                                                | MZ338981         | <i>Pseudarthrobacter siccitolerans</i> (CAQI01000001; 99.1%)                  | 9.1           |
|                      |                                                                | MZ338982         | <i>Staphylococcus hominis</i> subsp. <i>novobiosepticus</i> (AB233326; 99.3%) | 18.2          |
|                      |                                                                | MZ338983         | <i>Streptomyces spiroverticillatus</i> (AB249921; 99.0%)                      | 9.1           |
| Sala del Lago 2      | 130±40                                                         | MZ338984         | <i>Micrococcus luteus</i> (CP001628; 99.7%)                                   | 92.0          |
|                      |                                                                | MZ338985         | <i>Terribacillus goriensis</i> (DQ519571; 100%)                               | 8.0           |
| Sala del Volcán      | 100±130                                                        | MZ338986         | <i>Aerococcus urinaeequi</i> (CP014162; 99.8%)                                | 10.0          |
|                      |                                                                | MZ338987         | <i>Bacillus mycoides</i> (ACMU01000002; 99.4%)                                | 5.0           |
|                      |                                                                | MZ338988         | <i>Microbacterium oleivorans</i> (BCRG01000019; 99.7%)                        | 5.0           |
|                      |                                                                | MZ338989         | <i>Micrococcus endophyticus</i> (EU005372; 99.4%)                             | 50.0          |
|                      |                                                                | MZ338990         | <i>Staphylococcus saprophyticus</i> subsp. <i>bovis</i> (AB233327; 99.4%)     | 30.0          |
| Sala de Los Desnudos | 50±10                                                          | MZ338991         | <i>Corynebacterium glutamicum</i> (BA000036; 99.9%)                           | 55.6          |
|                      |                                                                | MZ338992         | <i>Micrococcus endophyticus</i> (EU005372; 99.5%)                             | 44.4          |
| Exit Passage         | 120±70                                                         | MZ338993         | <i>Aerococcus urinaeequi</i> (CP014162; 99.9%)                                | 20.8          |
|                      |                                                                | LN650668         | <i>Bacillus onubensis</i> sp. nov. (NSEB01000017)                             | 4.2           |
|                      |                                                                | MZ338994         | <i>Empedobacter brevis</i> (AM177497; 99.5%)                                  | 20.8          |
|                      |                                                                | MZ338995         | <i>Kaistella montana</i> (KX082815; 98.9%)                                    | 12.5          |
|                      |                                                                | MZ338996         | <i>Knoellia subterranea</i> (AVPK01000001; 98.8%)                             | 12.5          |
|                      |                                                                | MZ338997         | <i>Micrococcus endophyticus</i> (EU005372; 99.5%)                             | 20.8          |
|                      |                                                                | MZ338998         | <i>Pseudomonas stutzeri</i> (CP002881; 99.7%)                                 | 8.3           |
| Outdoor air          | 690±0                                                          | MZ338999         | <i>Arthrobacter oryzae</i> (AB279889; 99.9%)                                  | 14.4          |
|                      |                                                                | LN650668         | <i>Bacillus onubensis</i> sp. nov. (NSEB01000017)                             | 5.9           |
|                      |                                                                | MZ339000         | <i>Bacillus zhangzhouensis</i> (JOTP01000061; 99.7%)                          | 3.4           |
|                      |                                                                | MZ339001         | <i>Chryseomicrobium aureum</i> (KF781632; 99.4%)                              | 10.2          |
|                      |                                                                | MZ339002         | <i>Corynebacterium glutamicum</i> (BA000036; 99.9%)                           | 2.5           |
|                      |                                                                | MZ339003         | <i>Kocuria salina</i> (LT674162; 99.2%)                                       | 0.8           |
|                      |                                                                | MZ339004         | <i>Massilia brevitalea</i> (EF546777; 98.8%)                                  | 4.2           |
|                      |                                                                | MZ339005         | <i>Metabacillus litoralis</i> (AY608605; 99.2%)                               | 0.8           |
|                      |                                                                | MZ339006         | <i>Microbacterium esteraromaticum</i> (Y17231; 99.8%)                         | 17.8          |
| MZ339007             | <i>Microbacterium hydrocarbonoxydans</i> (BCRF01000095; 99.1%) | 5.1              |                                                                               |               |

**Supplementary Table S10. Continuation.**

| Sampling    | CFU/m <sup>3</sup> air | Accession Number | Identification (% identity)                                       | Abundance (%) |
|-------------|------------------------|------------------|-------------------------------------------------------------------|---------------|
| Outdoor air |                        | MZ339008         | <i>Micrococcus endophyticus</i> (EU005372; 99.4%)                 | 11.0          |
|             |                        | MZ339009         | <i>Paenibacillus lautus</i> (BIMF01000051; 99.6%)                 | 5.9           |
|             |                        | MZ339010         | <i>Pseudomonas stutzeri</i> (CP002881; 99.6%)                     | 2.5           |
|             |                        | MZ339011         | <i>Staphylococcus cohnii</i> subsp. <i>cohnii</i> (D83361; 99.9%) | 14.4          |
|             |                        | MZ339012         | <i>Staphylococcus succinus</i> (AF004220; 99.7%)                  | 0.8           |

**Supplementary Table S11.** Sampling campaign in *Gruta de las Maravillas*, autumn 2011. CFU/m<sup>3</sup>, accession numbers, identifications and abundances.

| Sampling            | CFU/m <sup>3</sup> air                                                            | Accession Number | Identification (% identity)                                                   | Abundance (%) |
|---------------------|-----------------------------------------------------------------------------------|------------------|-------------------------------------------------------------------------------|---------------|
| Sala de Las Conchas | 760±247                                                                           | MZ339013         | <i>Acinetobacter haemolyticus</i> (APQQ01000002; 99.4%)                       | 0.8           |
|                     |                                                                                   | MZ339014         | <i>Aerococcus urinaeequi</i> (CP014162; 99.8%)                                | 2.4           |
|                     |                                                                                   | MZ339015         | <i>Bacillus siamensis</i> (AJVF01000043; 99.9%)                               | 0.8           |
|                     |                                                                                   | MZ339016         | <i>Curtobacterium flaccumfaciens</i> (AJ312209; 100%)                         | 5.5           |
|                     |                                                                                   | MZ339017         | <i>Kocuria arsenatis</i> (KM874399; 99.9%)                                    | 2.4           |
|                     |                                                                                   | MZ339018         | <i>Massilia timonae</i> (AGZI01000009; 99.4%)                                 | 3.9           |
|                     |                                                                                   | MZ339019         | <i>Micrococcus endophyticus</i> (EU005372; 99.2%)                             | 74.8          |
|                     |                                                                                   | MZ339020         | <i>Pseudomonas caspiana</i> (LOHF01000033; 99.8%)                             | 0.8           |
|                     |                                                                                   | MZ339021         | <i>Psychrobacter faecalis</i> (AJ421528; 99.8%)                               | 5.5           |
|                     |                                                                                   | MZ339022         | <i>Staphylococcus hominis</i> subsp. <i>novobiosepticus</i> (AB233326; 99.9%) | 1.6           |
| MZ339023            | <i>Staphylococcus saprophyticus</i> subsp. <i>saprophyticus</i> (AP008934; 99.9%) | 1.6              |                                                                               |               |
| Sala del Lago 2     | 540±60                                                                            | MZ339024         | <i>Acinetobacter johnsonii</i> (APON01000005; 99.3%)                          | 2.1           |
|                     |                                                                                   | MZ339025         | <i>Aerococcus urinaeequi</i> (CP014162; 100%)                                 | 5.2           |
|                     |                                                                                   | MZ339026         | <i>Haematobacter massiliensis</i> (DQ342309; 100%)                            | 7.3           |
|                     |                                                                                   | MZ339027         | <i>Kaistella montana</i> (KX082815; 98.9%)                                    | 7.3           |
|                     |                                                                                   | MZ339028         | <i>Massilia suwonensis</i> (FJ969487; 99.3%)                                  | 6.3           |
|                     |                                                                                   | MZ339029         | <i>Microbacterium aurum</i> (CP018762; 98.6%)                                 | 2.1           |
|                     |                                                                                   | MZ339030         | <i>Micrococcus luteus</i> (CP001628; 99.6%)                                   | 63.5          |
|                     |                                                                                   | MZ339031         | <i>Roseomonas mucosa</i> (UGVN01000001; 100%)                                 | 5.2           |
| MZ339032            | <i>Streptomyces gardneri</i> (AB249908; 100%)                                     | 1.0              |                                                                               |               |
| Sala del Volcán     | 630±150                                                                           | MZ339033         | <i>Acinetobacter lwoffii</i> (AIEL01000120; 99.9%)                            | 3.7           |
|                     |                                                                                   | MZ339034         | <i>Aerococcus urinaeequi</i> (CP014162; 100%)                                 | 7.3           |
|                     |                                                                                   | MZ339035         | <i>Chryseobacterium tructae</i> (FR871429; 98.1%)                             | 1.8           |
|                     |                                                                                   | MZ339036         | <i>Luteimonas terrae</i> (KJ769177; 99.8%)                                    | 1.8           |
|                     |                                                                                   | MZ339037         | <i>Massilia haematophila</i> (AM774589; 99.0%)                                | 3.7           |
|                     |                                                                                   | MZ339038         | <i>Massilia timonae</i> (AGZI01000009; 99.5%)                                 | 4.6           |
|                     |                                                                                   | MZ339039         | <i>Microbacterium lacus</i> (AB286030; 99.3%)                                 | 25.7          |
|                     |                                                                                   | MZ339040         | <i>Micrococcus luteus</i> (CP001628; 99.8%)                                   | 35.8          |
|                     |                                                                                   | MZ339042         | <i>Rahnella victoriana</i> (KF308403; 99.8%)                                  | 11.0          |
| MZ339041            | <i>Paracoccus caeni</i> (GQ250442; 100%)                                          | 4.6              |                                                                               |               |

Supplementary Table S11. Continuation.

| Sampling             | CFU/m <sup>3</sup> air                                                            | Accession Number | Identification (% identity)                                                           | Abundance (%) |
|----------------------|-----------------------------------------------------------------------------------|------------------|---------------------------------------------------------------------------------------|---------------|
| Sala de Los Desnudos | 200±70                                                                            | MZ339043         | <i>Brachybacterium paraconglomeratum</i> (AJ415377; 99.5%)                            | 2.6           |
|                      |                                                                                   | MZ339044         | <i>Brevundimonas vesicularis</i> (BCWM01000033)/ <i>B. nasdae</i> (AB071954); (99.7%) | 5.3           |
|                      |                                                                                   | MZ339045         | <i>Massilia suwonensis</i> (FJ969487; 98.7%)                                          | 7.9           |
|                      |                                                                                   | MZ339046         | <i>Microbacterium phyllosphaerae</i> (AJ277840; 98.9%)                                | 2.6           |
|                      |                                                                                   | MZ339047         | <i>Micrococcus luteus</i> (CP001628; 99.7%)                                           | 63.2          |
|                      |                                                                                   | MZ339048         | <i>Paenibacillus uliginis</i> (FN556467; 99.4%)                                       | 2.6           |
|                      |                                                                                   | MZ339049         | <i>Pseudomonas moorei</i> (AM293566; 97.9%)                                           | 5.3           |
|                      |                                                                                   | MZ339050         | <i>Staphylococcus edaphicus</i> (KY315825; 99.6%)                                     | 10.5          |
| Exit Passage         | 930±270                                                                           | MZ339051         | <i>Aerococcus urinaeequi</i> (CP014162; 99.9%)                                        | 7.2           |
|                      |                                                                                   | MZ339052         | <i>Bacillus altitudinis</i> (ASJC01000029; 99.5%)                                     | 8.6           |
|                      |                                                                                   | MZ339053         | <i>Corynebacterium xerosis</i> (LAYS01000008; 100%)                                   | 0.7           |
|                      |                                                                                   | MZ339054         | <i>Kocuria rosea</i> (X87756; 98.7%)                                                  | 4.6           |
|                      |                                                                                   | MZ339055         | <i>Microbacterium esteraromaticum</i> (Y17231; 99.8%)                                 | 5.9           |
|                      |                                                                                   | MZ339056         | <i>Micrococcus luteus</i> (CP001628; 99.8%)                                           | 63.8          |
|                      |                                                                                   | MZ339057         | <i>Prolinoborus fasciculus</i> (JN175353; 99.9%)                                      | 6.6           |
|                      |                                                                                   | MZ339058         | <i>Pseudomonas stutzeri</i> (CP002881; 99.9%)                                         | 0.7           |
| MZ339059             | <i>Staphylococcus edaphicus</i> (KY315825; 100%)                                  | 2.0              |                                                                                       |               |
| Outdoor air          | 360±20                                                                            | MZ339060         | <i>Acinetobacter halotolerans</i> (KT032155; 98.7%)                                   | 9.6           |
|                      |                                                                                   | MZ339061         | <i>Aerococcus urinaeequi</i> (CP014162; 99.9%)                                        | 6.5           |
|                      |                                                                                   | MZ339062         | <i>Arthrobacter ulcerisalmonis</i> (MK211245; 98.9%)                                  | 4.8           |
|                      |                                                                                   | MZ339063         | <i>Exiguobacterium mexicanum</i> (AM072764; 100%)                                     | 9.6           |
|                      |                                                                                   | MZ339064         | <i>Micrococcus luteus</i> (CP001628; 99.8%)                                           | 50.0          |
|                      |                                                                                   | MZ339065         | <i>Neobacillus niacini</i> (AB021194; 99.1%)                                          | 3.3           |
|                      |                                                                                   | MZ339066         | <i>Rhodococcus corynebacterioides</i> (AF430066; 99.7%)                               | 1.6           |
|                      |                                                                                   | MZ339067         | <i>Sphingomonas olei</i> (KX672814; 99.6%)                                            | 6.5           |
|                      |                                                                                   | MZ339068         | <i>Staphylococcus equorum</i> subsp. <i>equorum</i> (AB009939; 100%)                  | 3.3           |
| MZ339069             | <i>Staphylococcus saprophyticus</i> subsp. <i>saprophyticus</i> (AP008934; 99.8%) | 4.8              |                                                                                       |               |

**Supplementary Table S12.** Sampling campaign in *Gruta de las Maravillas*, winter 2012. CFU/m<sup>3</sup>, accession numbers, identifications and abundances.

| Sampling            | CFU/m <sup>3</sup> air                           | Accession Number | Identification (% identity)                                                           | Abundance (%) |
|---------------------|--------------------------------------------------|------------------|---------------------------------------------------------------------------------------|---------------|
| Sala de Las Conchas | 130±42                                           | MZ339070         | <i>Acinetobacter lwoffii</i> (AIEL01000120; 99.9%)                                    | 3.8           |
|                     |                                                  | MZ339071         | <i>Agrococcus baldri</i> (FOZN01000001; 99.4%)                                        | 23.1          |
|                     |                                                  | MZ339072         | <i>Arthrobacter globiformis</i> (BAEG01000072; 99.5%)                                 | 3.8           |
|                     |                                                  | MZ339073         | <i>Brevundimonas vesicularis</i> (BCWM01000033)/ <i>B. nasdae</i> (AB071954); (99.3%) | 7.7           |
|                     |                                                  | MZ339074         | <i>Macrococcus equipercicus</i> (Y15712; 100%)                                        | 3.8           |
|                     |                                                  | MZ339076         | <i>Micrococcus luteus</i> (CP001628; 99.5%)                                           | 38.5          |
|                     |                                                  | MZ339075         | <i>Micrococcus terreus</i> (jgi.1058018; 99.9%)                                       | 7.7           |
|                     |                                                  | MZ339077         | <i>Staphylococcus equorum</i> subsp. <i>equorum</i> (AB009939; 99.8%)                 | 7.7           |
| MZ339078            | <i>Streptomyces avidinii</i> (AB184395; 99.8%)   | 3.8              |                                                                                       |               |
| Sala del Lago 2     | 360±10                                           | MZ339079         | <i>Acinetobacter baumannii</i> (ACQB01000091; 97.7%)                                  | 1.5           |
|                     |                                                  | MZ339080         | <i>Acinetobacter johnsonii</i> (APON01000005; 99.4%)                                  | 4.6           |
|                     |                                                  | MZ339081         | <i>Aerococcus urinaeequi</i> (CP014162; 100%)                                         | 10.8          |
|                     |                                                  | MZ339082         | <i>Arthrobacter citreus</i> (X80737; 100%)                                            | 7.7           |
|                     |                                                  | MZ339083         | <i>Bacillus licheniformis</i> (AE017333; 99.5%)                                       | 1.5           |
|                     |                                                  | MZ339084         | <i>Bacillus megaterium</i> (JJMH01000057; 99.8%)                                      | 3.1           |
|                     |                                                  | MZ339085         | <i>Brevundimonas vesicularis</i> (BCWM01000033)/ <i>B. nasdae</i> (AB071954); (99.3%) | 1.5           |
|                     |                                                  | MZ339086         | <i>Corynebacterium xerosis</i> (LAYS01000008; 99.9%)                                  | 1.5           |
|                     |                                                  | MZ339087         | <i>Glutamicibacter arilaitensis</i> (FQ311875; 100%)                                  | 1.5           |
|                     |                                                  | MZ339088         | <i>Janibacter limosus</i> (Y08539; 98.8%)                                             | 10.8          |
|                     |                                                  | MZ339089         | <i>Kaistella anthropi</i> (AM982786; 98.1%)                                           | 4.6           |
|                     |                                                  | MZ339090         | <i>Macrococcus equipercicus</i> (Y15712; 100%)                                        | 3.1           |
|                     |                                                  | MZ339091         | <i>Microbacterium aurum</i> (CP018762; 98.6%)                                         | 7.7           |
|                     |                                                  | MZ339092         | <i>Micrococcus luteus</i> (CP001628; 99.7%)                                           | 24.6          |
|                     |                                                  | MZ339093         | <i>Planococcus rifietoensis</i> (CP013659; 100%)                                      | 3.1           |
|                     |                                                  | MZ339095         | <i>Sporosarcina luteola</i> (AB473560; 100%)                                          | 4.6           |
| MZ339094            | <i>Staphylococcus borealis</i> (MT586030; 99.9%) | 7.7              |                                                                                       |               |

Supplementary Table S12. Continuation.

| Sampling             | CFU/m <sup>3</sup> air                              | Accession Number | Identification (% identity)                                                           | Abundance (%) |
|----------------------|-----------------------------------------------------|------------------|---------------------------------------------------------------------------------------|---------------|
| Sala del Volcán      | 140±30                                              | MZ339096         | <i>Alcaligenes faecalis</i> subsp. <i>phenolicus</i> (AUBT01000026; 99.2%)            | 4.0           |
|                      |                                                     | MZ339097         | <i>Brachybacterium paraconglomeratum</i> (AJ415377; 99.9%)                            | 12.0          |
|                      |                                                     | MZ339098         | <i>Brevundimonas vesicularis</i> (BCWM01000033)/ <i>B. nasdae</i> (AB071954); (99.4%) | 8.0           |
|                      |                                                     | MZ339099         | <i>Glutamicibacter arilaitensis</i> (FQ311875; 100%)                                  | 28.0          |
|                      |                                                     | MZ339100         | <i>Kaistella anthropi</i> (AM982786; 97.9%)                                           | 4.0           |
|                      |                                                     | MZ339101         | <i>Microbacterium ginsengiterrae</i> (EU873314; 99.5%)                                | 12.0          |
|                      |                                                     | MZ339102         | <i>Micrococcus luteus</i> (CP001628; 99.7%)                                           | 12.0          |
|                      |                                                     | MZ339103         | <i>Prolinoborus fasciculus</i> (JN175353; 98.6%)                                      | 8.0           |
|                      |                                                     | MZ339104         | <i>Sphingobacterium lactis</i> (jgi.1085797; 99.8%)                                   | 4.0           |
| MZ339105             | <i>Streptomyces xantholiticus</i> (AB184349; 99.2%) | 8.0              |                                                                                       |               |
| Sala de Los Desnudos | 190±60                                              | MZ339106         | <i>Achromobacter piechaudii</i> (BCTK01000022; 99.8%)                                 | 8.8           |
|                      |                                                     | MZ339107         | <i>Acinetobacter halotolerans</i> (KT032155; 98.7%)                                   | 2.9           |
|                      |                                                     | MZ339108         | <i>Acinetobacter ursingii</i> (AIEA01000080; 100%)                                    | 2.9           |
|                      |                                                     | MZ339109         | <i>Brevundimonas vesicularis</i> (BCWM01000033)/ <i>B. nasdae</i> (AB071954); (99.7%) | 17.7          |
|                      |                                                     | MZ339110         | <i>Dietzia timorensis</i> (LMTB01000088; 99.9%)                                       | 2.9           |
|                      |                                                     | MZ339111         | <i>Microbacterium aurum</i> (CP018762; 98.6%)                                         | 23.5          |
|                      |                                                     | MZ339112         | <i>Micrococcus luteus</i> (CP001628; 99.7%)                                           | 32.4          |
|                      |                                                     | MZ339113         | <i>Promicromonospora xylanilytica</i> (FJ214352; 99.6%)                               | 2.9           |
| MZ339114             | <i>Staphylococcus simulans</i> (D83373; 99.8%)      | 5.9              |                                                                                       |               |
| Exit Passage         | 120±50                                              | MZ339115         | <i>Brevundimonas vesicularis</i> (BCWM01000033)/ <i>B. nasdae</i> (AB071954); (99.6%) | 8.7           |
|                      |                                                     | MZ339116         | <i>Cupriavidus oxalaticus</i> (AF155567; 99.4%)                                       | 4.3           |
|                      |                                                     | MZ339117         | <i>Glutamicibacter arilaitensis</i> (FQ311875; 100%)                                  | 4.3           |
|                      |                                                     | MZ339118         | <i>Limimanicola cinnabarinus</i> (BATB01000114; 96.6%)                                | 4.3           |
|                      |                                                     | MZ339119         | <i>Macrococcus equipercicus</i> (Y15712; 99.9%)                                       | 4.3           |
|                      |                                                     | MZ339120         | <i>Microbacterium aurum</i> (CP018762; 98.7%)                                         | 13.0          |
|                      |                                                     | MZ339121         | <i>Micrococcus luteus</i> (CP001628; 99.6%)                                           | 39.1          |
|                      |                                                     | MZ339122         | <i>Neobacillus niacini</i> (AB021194; 99.2%)                                          | 4.3           |
|                      |                                                     | MZ339123         | <i>Rhodococcus yunnanensis</i> (BCXH01000047; 99.7%)                                  | 4.3           |
|                      |                                                     | MZ339124         | <i>Streptomyces gardneri</i> (AB249908; 100%)                                         | 4.3           |
| MZ339125             | <i>Streptomyces olivaceus</i> (JOFH01000101; 99.5%) | 8.7              |                                                                                       |               |

Supplementary Table S12. Continuation.

| Sampling    | CFU/m <sup>3</sup> air                                                                                                  | Accession Number | Identification (% identity)                                                                                                      | Abundance (%) |
|-------------|-------------------------------------------------------------------------------------------------------------------------|------------------|----------------------------------------------------------------------------------------------------------------------------------|---------------|
| Outdoor air | 1190±300                                                                                                                | MZ339126         | <i>Arthrobacter bussei</i> (MN080869; 99.9%)                                                                                     | 16.9          |
|             |                                                                                                                         | MZ339127         | <i>Arthrobacter gandavensis</i> (AJ316140; 99.9%)                                                                                | 3.4           |
|             |                                                                                                                         | MZ339128         | <i>Bacillus altitudinis</i> (ASJC01000029; 99.9%)                                                                                | 0.5           |
|             |                                                                                                                         | MZ339129         | <i>Bacillus aryabhatai</i> (EF114313; 100%)                                                                                      | 2.3           |
|             |                                                                                                                         | MZ339130         | <i>Bacillus paramycoides</i> (MAOI01000012)/ <i>B. paranthracis</i> (MACE01000012)/ <i>B. nitratreducens</i> (KJ812430); (99.8%) | 4.5           |
|             |                                                                                                                         | MZ339131         | <i>Bhargavaea beijingensis</i> (EF371374; 99.6%)                                                                                 | 4.0           |
|             |                                                                                                                         | MZ339132         | <i>Bhargavaea ginsengi</i> (EF371375; 99.9%)                                                                                     | 1.7           |
|             |                                                                                                                         | MZ339133         | <i>Brevibacterium frigoritolerans</i> (AM747813)/ <i>Peribacillus simplex</i> (BCVO01000086); (99.9%)                            | 0.5           |
|             |                                                                                                                         | MZ339134         | <i>Citricoccus zhacaiensis</i> (EU305672; 98.7%)                                                                                 | 2.8           |
|             |                                                                                                                         | MZ339135         | <i>Curtobacterium flaccumfaciens</i> (AJ312209; 100%)                                                                            | 11.3          |
|             |                                                                                                                         | MZ339136         | <i>Cytobacillus oceanisediminis</i> (GQ292772; 98.5%)                                                                            | 1.1           |
|             |                                                                                                                         | MZ339137         | <i>Exiguobacterium mexicanum</i> (AM072764; 100%)                                                                                | 8.4           |
|             |                                                                                                                         | MZ339138         | <i>Kocuria rosea</i> (X87756; 99.6%)                                                                                             | 1.1           |
|             |                                                                                                                         | MZ339139         | <i>Microbacterium aurum</i> (CP018762; 98.4%)                                                                                    | 6.2           |
|             |                                                                                                                         | MZ339140         | <i>Microbacterium endophyticum</i> (KJ920264; 98.5%)                                                                             | 10.7          |
|             |                                                                                                                         | MZ339141         | <i>Pseudarthrobacter equi</i> (LT629779; 100%)                                                                                   | 7.4           |
|             |                                                                                                                         | MZ339142         | <i>Pseudarthrobacter phenanthrenivorans</i> (CP002379; 99.9%)                                                                    | 5.6           |
|             |                                                                                                                         | MZ339143         | <i>Rathayibacter caricis</i> (AF159364; 99.7%)                                                                                   | 2.3           |
|             |                                                                                                                         | MZ339144         | <i>Rhodococcus cerastii</i> (FR714842; 99.7%)                                                                                    | 2.3           |
|             |                                                                                                                         | MZ339145         | <i>Staphylococcus equorum</i> subsp. <i>equorum</i> (AB009939; 100%)                                                             | 2.8           |
| MZ339146    | <i>Streptomyces daghestanicus</i> (DQ442497)/ <i>S. albidoflavus</i> (Z76676)/ <i>S. violascens</i> (AY999737); (99.7%) | 1.7              |                                                                                                                                  |               |
| MZ339147    | <i>Streptomyces prasinus</i> (LIRH01000162; 98.3%)                                                                      | 2.3              |                                                                                                                                  |               |
